# Supplementary material
Source: Research Square preprint supplement (doi:10.21203/rs.3.rs-9589129/v1)
Supplement: Supplementary file 1 [file 857491b4e5d23c7441b89320.pdf]

## **Supplemental Information**

### **Preliminary Interviews**

As a purely exploratory investigation to set the groundwork for developing AI tools, eight 1:1 in-depth interviews were conducted with both Spring Health and non Spring Health therapists to understand their opinion of AI tools prior to implementation of session recording and AI-notetaking. Interviews focused on trust, education, and use cases hypothesized to contribute to utilization. These interviews were not subject to formal qualitative analysis; rather they served to highlight only general opinion, trends, and AI tool experience among providers.

Some providers had used AI tools such as chatGPT in their personal life and watched the space of AI closely. They were intrigued by the progression of the technology and were eager to test out AI tools professionally to get a sense of their effectiveness and usefulness. This suggests there is a segment of therapists who are more intrinsically motivated to try out new AI technologies and who are more comfortable using such tools. (Although we did not collect user experience data from patients, the same is likely true for a segment of patients).

However, there was also a segment of providers who had little experience with AI and were much more reluctant to adopt such technologies. They expressed doubt that session recordings could ever be truly temporary or deleted, believing that “everything leaves a footprint.” They worried about breaches, misuse of PHI, or lack of transparency about where data is stored, for how long, and who has access.

Overall, regardless of their initial attitude about AI, providers feared that recording sessions could undermine the trust and openness that therapy relies on. They worried that in-session AI tools or knowledge that a session was being recorded might distract therapists, making them less present, or even harm client perceptions of their therapist’s professionalism.

## Supplemental Data

Supplemental Table 1. Time spent on clinical note as a function of AI-notetaking usage

| <i>Predictors</i>                                         | <b>Time (mins) spent on clinical note</b> |               |                |
|-----------------------------------------------------------|-------------------------------------------|---------------|----------------|
|                                                           | <i>Estimates</i>                          | <i>CI</i>     | <i>p</i>       |
| (Intercept)                                               | 27.30                                     | 26.93 – 27.66 | < <b>0.001</b> |
| AI tool usage [session recorded, but AI-notes not copied] | -2.69                                     | -2.96 – -2.42 | < <b>0.001</b> |
| AI tool usage [session recorded and AI-notes copied]      | -8.54                                     | -8.73 – -8.36 | < <b>0.001</b> |
| <b>Random Effects</b>                                     |                                           |               |                |
| $\sigma^2$                                                | 761.82                                    |               |                |
| $\tau_{00\_PROVIDER\_ID}$                                 | 248.53                                    |               |                |
| ICC                                                       | 0.25                                      |               |                |
| $N_{\_PROVIDER\_ID}$                                      | 8619                                      |               |                |
| Observations                                              | 752479                                    |               |                |
| Marginal R <sup>2</sup> / Conditional R <sup>2</sup>      | 0.014 / 0.256                             |               |                |

Supplemental Table 2. Time to submit and sign and submit clinical notes as a function of AI-notetaking usage.

| <i>Predictors</i>                                                                 | <b>Hours to submit note</b> |               |                |
|-----------------------------------------------------------------------------------|-----------------------------|---------------|----------------|
|                                                                                   | <i>Estimates</i>            | <i>CI</i>     | <i>p</i>       |
| (Intercept)                                                                       | 42.22                       | 41.34 – 43.09 | < <b>0.001</b> |
| AI tool usage [session recorded, but AI-notes not copied]                         | -4.54                       | -5.13 – -3.96 | < <b>0.001</b> |
| AI tool usage [session recorded and AI-notes copied]                              | -8.18                       | -8.80 – -7.56 | < <b>0.001</b> |
| <b>Random Effects</b>                                                             |                             |               |                |
| $\sigma^2$                                                                        | 1184.86                     |               |                |
| $\tau_{00}$ PROVIDER ID                                                           | 1567.10                     |               |                |
| $\tau_{11}$ PROVIDER ID.AI tool usage [session recorded, but AI-notes not copied] | 142.49                      |               |                |
| $\tau_{11}$ PROVIDER ID.AI tool usage [session recorded and AI-notes copied]      | 311.83                      |               |                |
| $\rho_{01}$                                                                       | -0.31                       |               |                |
|                                                                                   | -0.50                       |               |                |
| ICC                                                                               | 0.55                        |               |                |
| $N_{\text{PROVIDER ID}}$                                                          | 8532                        |               |                |
| Observations                                                                      | 689132                      |               |                |
| Marginal $R^2$ / Conditional $R^2$                                                | 0.005 / 0.551               |               |                |

Supplemental Table 3. Clinical notes submission “after hours” as a function of AI-notetaking usage.

| <i>Predictors</i>                                         | <b>After hours submission</b> |               |                |
|-----------------------------------------------------------|-------------------------------|---------------|----------------|
|                                                           | <i>Odds Ratios</i>            | <i>CI</i>     | <i>p</i>       |
| (Intercept)                                               | 0.081                         | 0.077 – 0.085 | < <b>0.001</b> |
| AI tool usage [session recorded, but AI-notes not copied] | 0.888                         | 0.861 – 0.915 | < <b>0.001</b> |
| AI tool usage [session recorded and AI-notes copied]      | 0.813                         | 0.796 – 0.830 | < <b>0.001</b> |
| <b>Random Effects</b>                                     |                               |               |                |
| $\sigma^2$                                                | 3.29                          |               |                |
| $\tau_{00 \text{ PROVIDER ID}}$                           | 3.74                          |               |                |
| ICC                                                       | 0.53                          |               |                |
| $N_{\text{PROVIDER ID}}$                                  | 8602                          |               |                |
| Observations                                              | 736780                        |               |                |
| Marginal R <sup>2</sup> / Conditional R <sup>2</sup>      | 0.001 / 0.533                 |               |                |

Supplemental Table 4. Clinical Symptom Improvement

| <i>Predictors</i>                                         | <b>Depression (PHQ 9)</b> |                             |                | <b>Anxiety (GAD 7)</b> |                             |                |
|-----------------------------------------------------------|---------------------------|-----------------------------|----------------|------------------------|-----------------------------|----------------|
|                                                           | <i>Estimates</i>          | <i>CI</i>                   | <i>p</i>       | <i>Estimates</i>       | <i>CI</i>                   | <i>p</i>       |
| (Intercept)                                               | 15.38                     | 15.28 – 15.49               | < <b>0.001</b> | 14.58                  | 14.49 – 14.66               | < <b>0.001</b> |
| AI tool usage [used AI]                                   | -0.07                     | -0.22 – 0.08                | 0.358          | -0.12                  | -0.24 – 0.00                | 0.058          |
| time in treatment (log-days)                              | -1.47                     | -1.50 – -1.44               | < <b>0.001</b> | -1.34                  | -1.37 – -1.31               | < <b>0.001</b> |
| AI tool usage [used AI] *<br>time in treatment (log-days) | -0.03                     | -0.07 – 0.02                | 0.265          | -0.01                  | -0.05 – 0.04                | 0.750          |
| <b>Random Effects</b>                                     |                           |                             |                |                        |                             |                |
| $\sigma^2$                                                | 11.79                     |                             |                | 10.83                  |                             |                |
| $\tau_{00}$                                               | 8.43                      | member_id                   |                | 2.39                   | member_id                   |                |
|                                                           | 0.42                      | provider_id                 |                | 0.12                   | provider_id                 |                |
| $\tau_{11}$                                               | 0.70                      | member_id:time_in_treatment |                | 0.49                   | member_id.time_in_treatment |                |
| $\rho_{01}$                                               | 0.03                      | member_id                   |                | 0.87                   | member_id                   |                |
| ICC                                                       | 0.59                      |                             |                | 0.54                   |                             |                |
| N                                                         | 14247                     | member_id                   |                | 14104                  | member_id                   |                |
|                                                           | 4212                      | provider_id                 |                | 4202                   | provider_id                 |                |
| Observations                                              | 43358                     |                             |                | 42690                  |                             |                |
| Marginal R <sup>2</sup> / Conditional R <sup>2</sup>      | 0.226 / 0.682             |                             |                | 0.225 / 0.646          |                             |                |
